# Supplementary material
Source: PubMed Central journal article supplement (PMC3079200)
Supplement: NIHMS271999-supplement-1.pdf [file NIHMS271999-supplement-1.pdf]

## Supplementary Information

### Methods:

Integrin quantification with flow cytometry and western blotting: U87MG and HeLa surface  $\alpha_v\beta_3$  integrin expression was analyzed by flow cytometry and Western blot. Cells were harvested and resuspended in FACS buffer (Dulbecco's phosphate-buffered saline with 2% BSA) and stained with the anti-integrin  $\alpha_v\beta_3$  monoclonal antibody (MAB1976, Chemicon International, Temecula, CA). Samples were read on a FACScan Analytic Flow Cytometer (Becton Dickinson). Cell lysates were assessed using  $\alpha_v$  Antibody (CD51) (611012 BD Biosciences, San Jose, CA) and Integrin  $\beta_3$  Antibody (4702, Cell Signaling Technology, Beverly, MA). Blotting was performed according to the manufacturer's instructions and imaged with the LI-COR Odyssey Imager using IR dye conjugated secondary antibodies.

**Supporting Figures:**

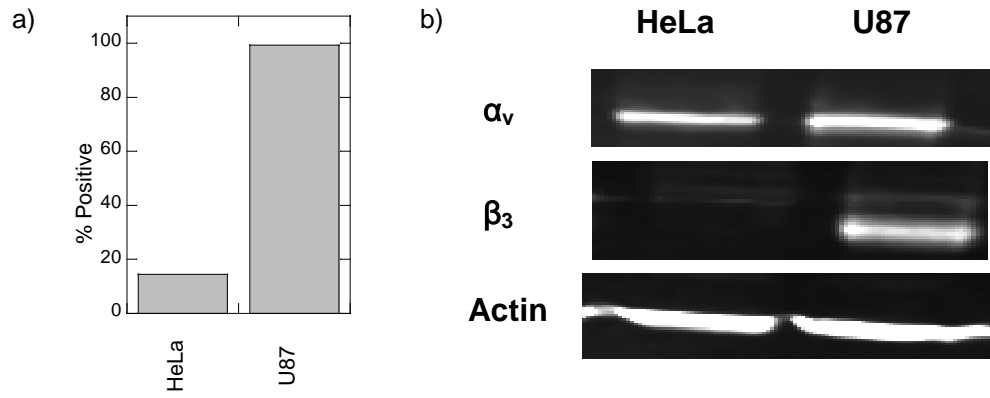

**Figure S1:** Integrin characterization of tumor cell lines used for in vivo assay. a) FACS of  $\alpha_v\beta_3$  integrin expression in U87 and HeLa cells b) Protein quantification using western blotting for integrins ( $\alpha_v$  and  $\beta_3$ ) and actin.

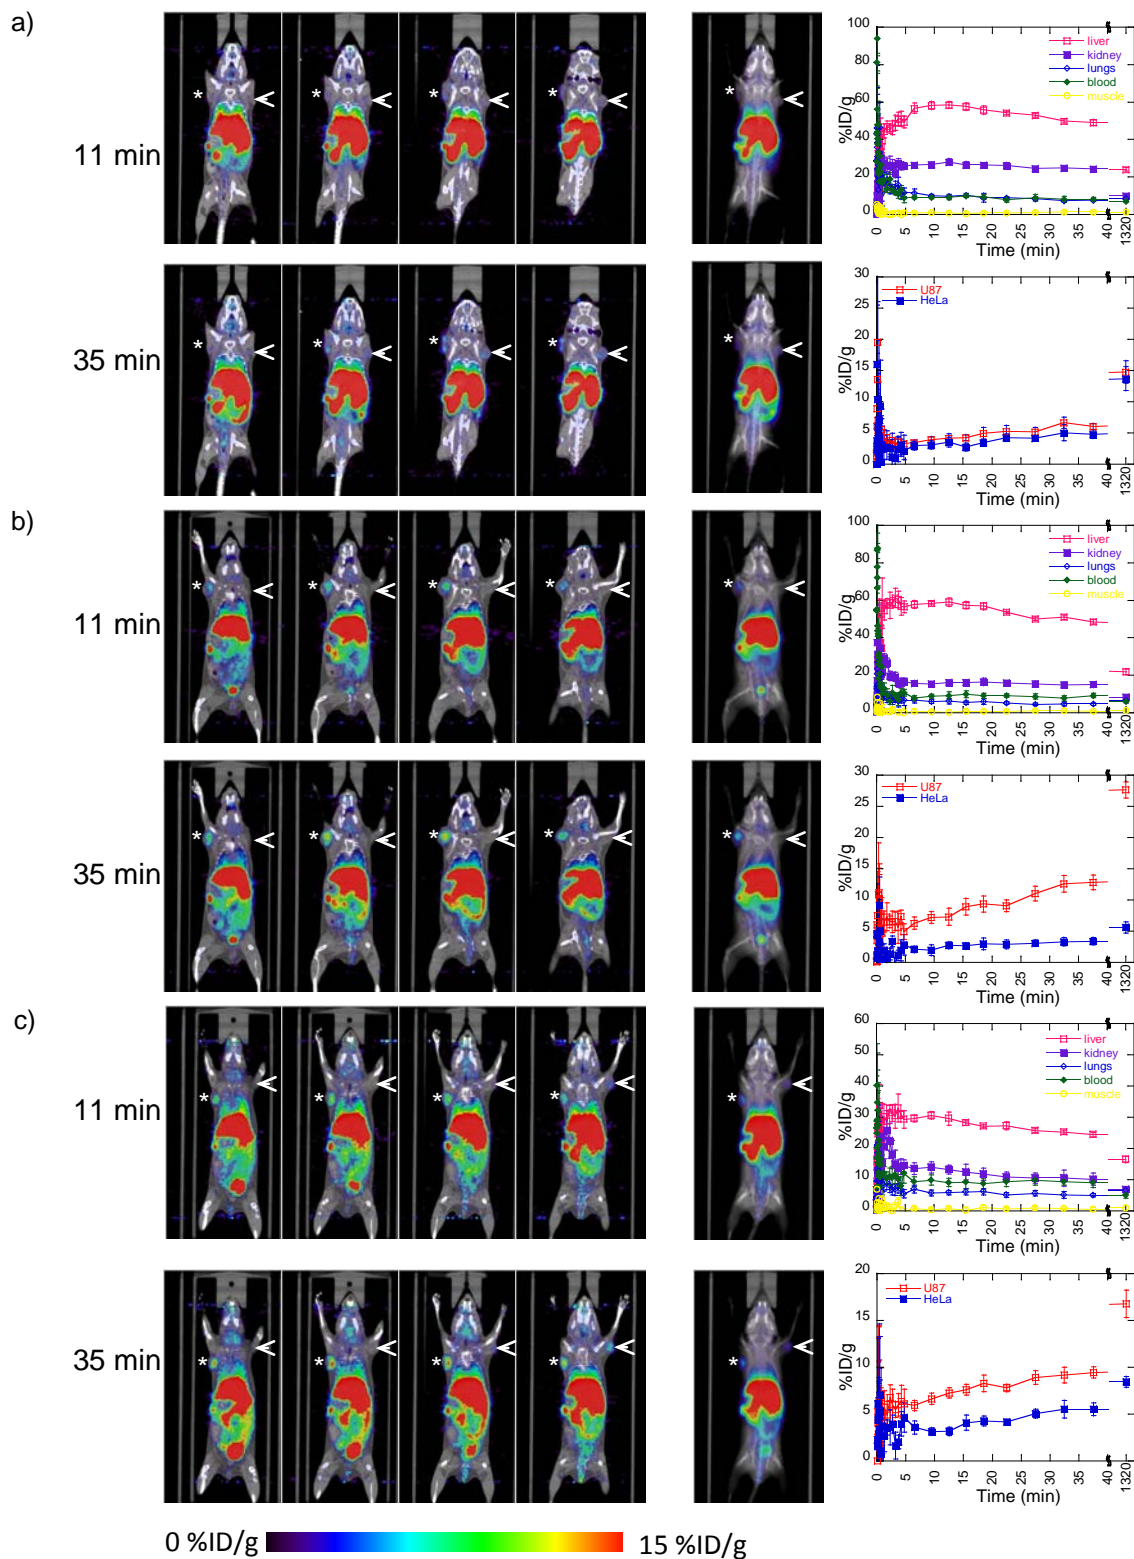

**Figure S2:** Dynamic biodistribution of DNA/PEI or DNA/PEI-Au polyplexes in SCID mice with U87 and HeLa tumors. PET/CT images (left) and signals in organs/tumors (right). a) DNA/PEI (control), b) DNA/PEI-Au (low), c) DNA/PEI-Au (high), (\*=U87, ← = HeLa, Z in mm)

**S3:** Static 3D reconstruction of MicoPET/CT biodistribution for RGD nanocluster modified DNA/PEI (low)

**S4:** Static 3D reconstruction of MicoPET/CT biodistribution for unmodified (control) DNA/PEI

**S5:** Dynamic 3D reconstruction of MicoPET/CT biodistribution for RGD nanocluster modified DNA/PEI (low)
